# Supplementary material for: Transcriptional Responses of the Bacterium Burkholderia terrae BS001 to the Fungal Host Lyophyllum sp. Strain Karsten under Soil-Mimicking Conditions
Source: PubMed Central journal article supplement (PMC5209427; doi:10.1007/s00248-016-0885-7), 2016-11-14

# **Transcriptional responses of the bacterium *Burkholderia terrae* BS001 to the fungal host *Lyophyllum* sp. strain Karsten under soil-mimicking conditions**

Irshad UI Haq\* Francisco Dini-Andreote and Jan Dirk van Elsas  
Microbial Ecology, Groningen Institute of Evolutionary Life Sciences (GELIFES),  
Nijenborgh 7, 9747 AG, University of Groningen, The Netherlands.

\*Corresponding author: Irshad UI Haq, Microbial Ecology, Groningen Institute of  
Evolutionary Life Sciences (GELIFES), Nijenborgh 7, 9747 AG, University of  
Groningen, The Netherlands.

E-mail address: [i.u.haq@rug.nl](mailto:i.u.haq@rug.nl)

**Microbial Ecology**

## Figure S1\_A

### Distribution of normalized reads number over COG classes

The distribution (normalized) of numbers of reads of transcripts belonging to different COG classes is shown, for treatments B (*B. terrae* BS001, in grey color) and B+F (*B. terrae* BS001 + *Lyophyllum* sp. strain Karsten, in black color). The X axis represents COG classes and the Y axis shows the number of normalized reads. **(a)** T1= day 3, **(b)** T2= day 5 and **(c)** T3= day 8..

**COG classes:** C– energy production and conversion; E– amino acid transport and metabolism; G– carbohydrate transport and metabolism; H– coenzyme transport and metabolism; I– lipid transport and metabolism; K– transcription; L– replication, recombination and repair; M– cell wall/membrane/envelope biogenesis; O– posttranslational modification, protein turnover, chaperones; P– inorganic ion transport and metabolism; Q– secondary metabolites biosynthesis, transport and catabolism; R– general function prediction; S– functions unknown; T– signal transduction mechanisms; U– intracellular trafficking, secretion, and vesicular transport; V– defense mechanisms.

Figure S1\_A

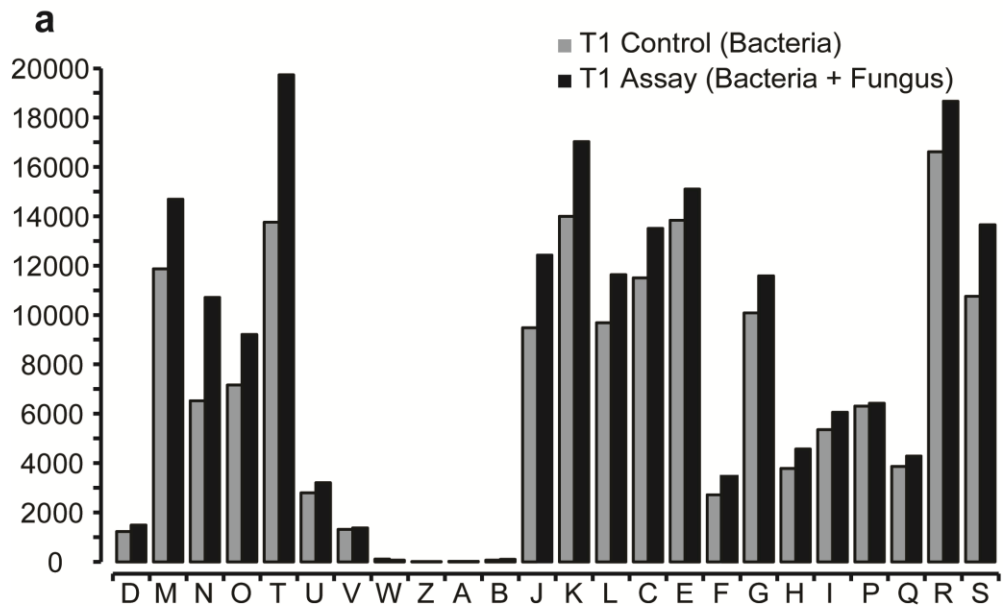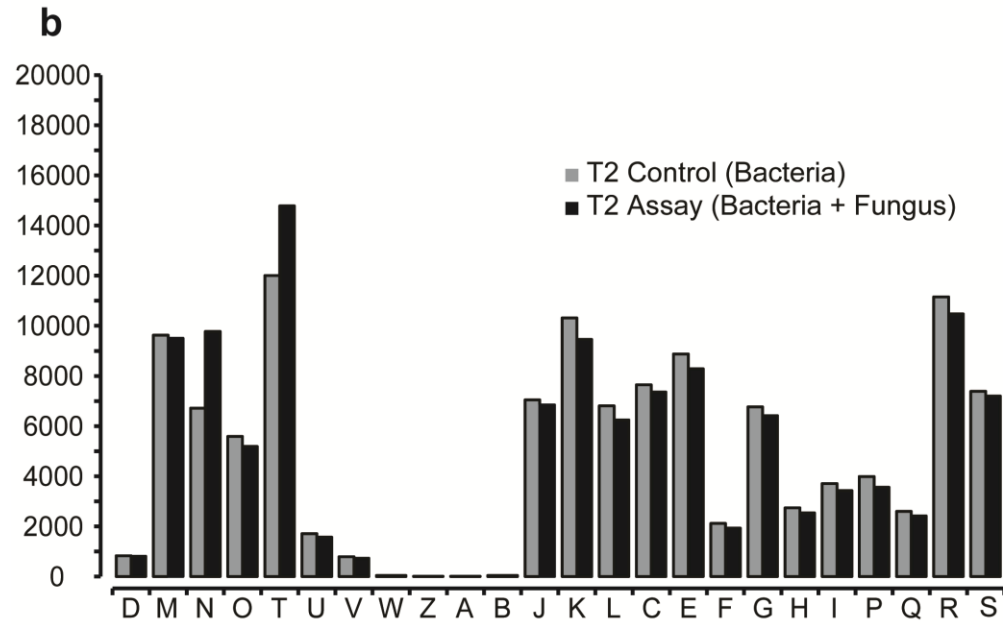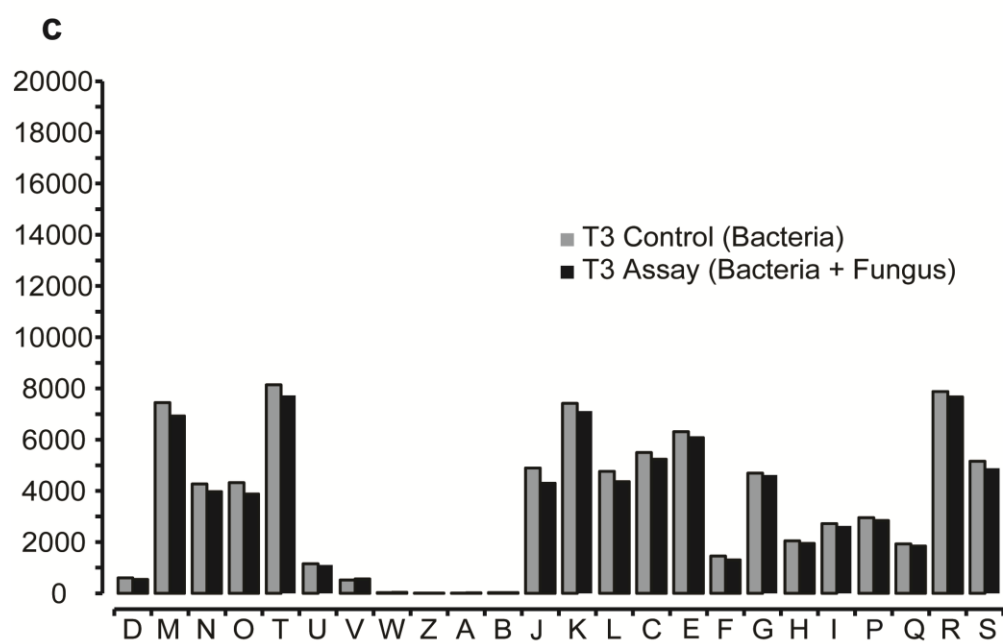

## Figure S1\_B

### Percentage distribution of normalized reads number over COG classes

The percentage distribution of normalized reads of transcripts belonging to different COG classes is shown, for treatments B (*B. terrae* BS001, in grey color) and B+F (*B. terrae* BS001 + *Lyophyllum* sp. strain Karsten, in black color). The X axis represents COG classes and the Y axis shows the number of normalized reads. **(a)** T1= day 3, **(b)** T2= day 5 and **(c)** T3= day 8. The percentage was calculated as the percentage of normalized reads belonging to the indicated COG classes with respect to normalized reads in both treatments.

**COG classes:** C– energy production and conversion; E– amino acid transport and metabolism; G– carbohydrate transport and metabolism; H– coenzyme transport and metabolism; I– lipid transport and metabolism; K– transcription; L– replication, recombination and repair; M– cell wall/membrane/envelope biogenesis; O– posttranslational modification, protein turnover, chaperones; P– inorganic ion transport and metabolism; Q– secondary metabolites biosynthesis, transport and catabolism; R– general function prediction; S– functions unknown; T– signal transduction mechanisms; U– intracellular trafficking, secretion, and vesicular transport; V– defense mechanisms.

Figure S1\_B

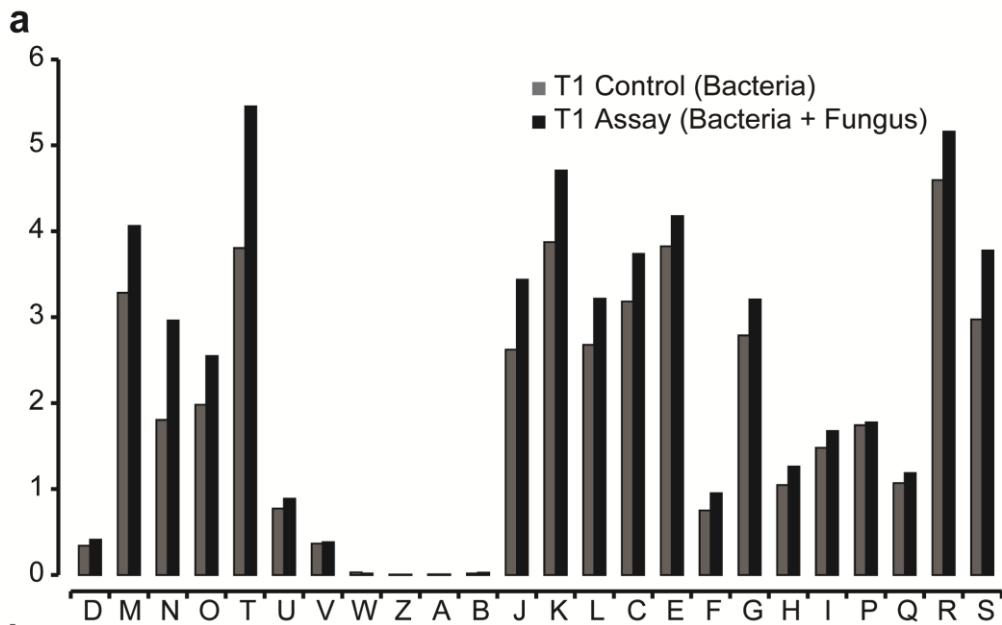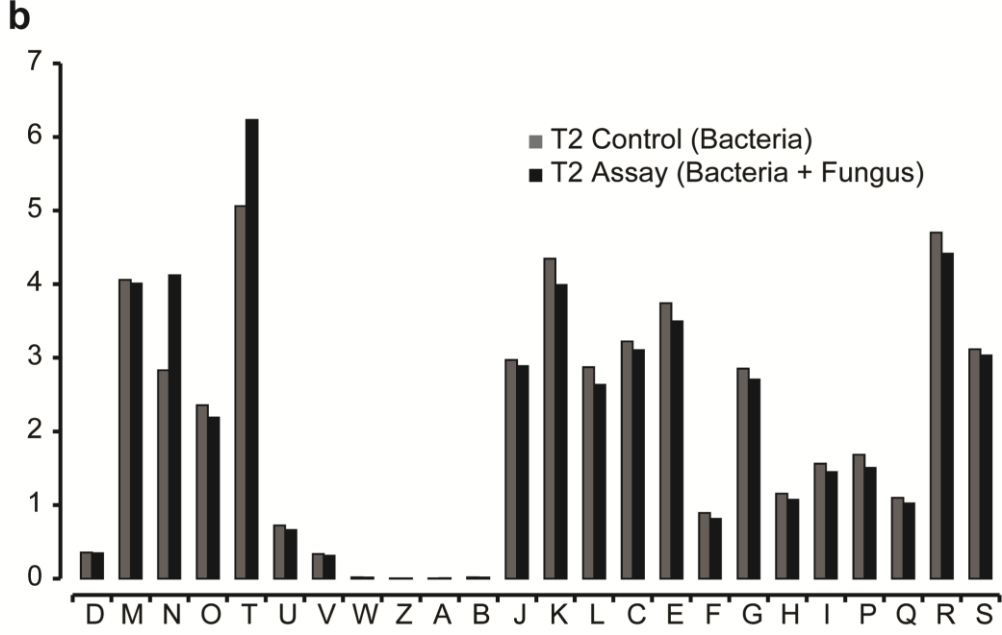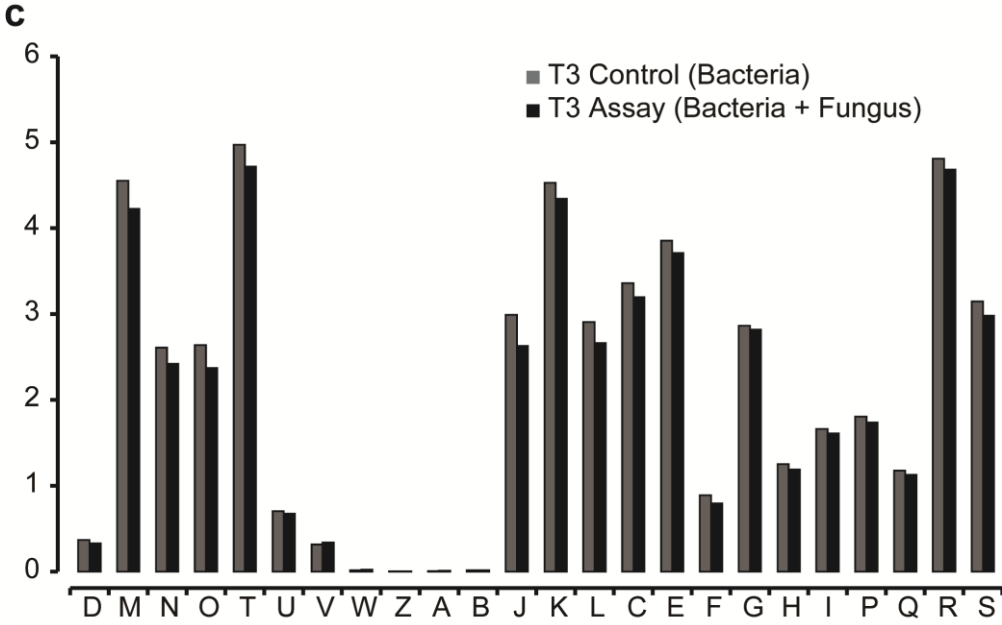

Supplement: 248_2016_885_MOESM1_ESM.pdf [file 248_2016_885_MOESM1_ESM.pdf]
