# Supplementary material for: Transcriptional Responses of the Bacterium Burkholderia terrae BS001 to the Fungal Host Lyophyllum sp. Strain Karsten under Soil-Mimicking Conditions
Source: PubMed Central journal article supplement (PMC5209427; doi:10.1007/s00248-016-0885-7), 2016-11-14

**Transcriptional responses of the bacterium *Burkholderia terrae* BS001 to the fungal host *Lyophyllum* sp. strain Karsten under soil-mimicking conditions**

Irshad UI Haq\* Francisco Dini-Andreote and Jan Dirk van Elsas  
Microbial Ecology Group, Groningen Institute of Evolutionary Life Sciences (GELIFES), Nijenborgh 7, 9747 AG, University of Groningen, The Netherlands.

\*Corresponding author: Irshad UI Haq, Microbial Ecology, Groningen Institute of Evolutionary Life Sciences (GELIFES), Nijenborgh 7, 9747 AG, University of Groningen, The Netherlands.  
E-mail address: [i.u.haq@rug.nl](mailto:i.u.haq@rug.nl)

**Microbial Ecology**

## Figure S2

**Volcano plots** showing the log<sub>2</sub> fold changes (X – axis) with  $-\log_{10}$  (*P* value) on the Y – axis for time point 1 (day 3) (**a**), time point 2 (day5) (**b**) and time point 3 (day8) (**c**). Dashed vertical lines shows log<sub>2</sub> fold change thresholds ( $>1.5$  or  $<-1.5$ ; red dots). Horizontal dashed line shows the boundary line of  $P<0.05$ .

**MA plots** showing overall distribution of differentially expressed genes of *B. terrae* BS001 (red dots  $P<0.05$ ) at **d**) time point 1 (day 3), **e**) time point 2 (day5), and **f**) time point 3 (day8), in the presence of *Lyophyllum* sp. strain Karsten. Y – axis represent the log<sub>2</sub> fold change (strain BS001 alone and strain BS001 with *Lyophyllum* sp. strain Karsten), whereas the X – axis shows mean of normalized reads counts for both treatments.

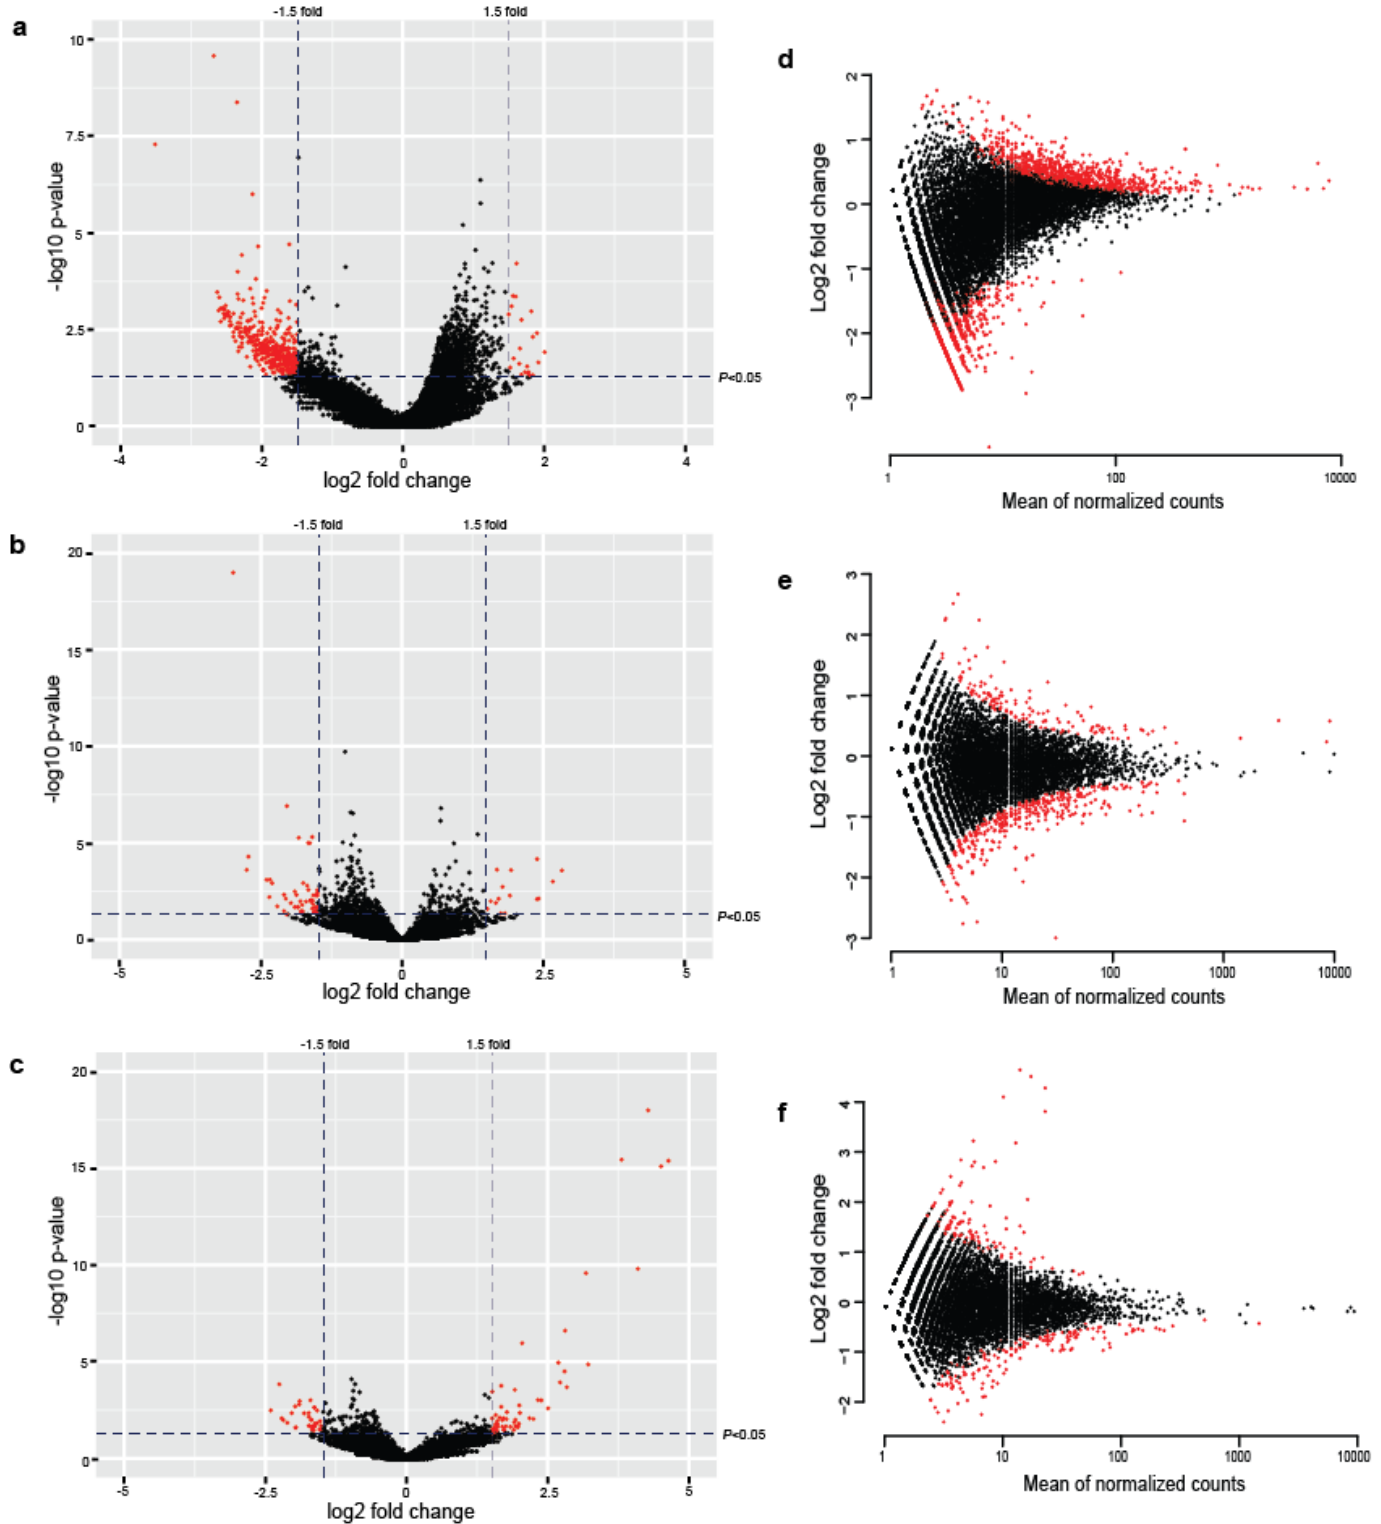

Supplement: 248_2016_885_MOESM2_ESM.pdf [file 248_2016_885_MOESM2_ESM.pdf]
