# Supplementary material for: Transcriptional Responses of the Bacterium Burkholderia terrae BS001 to the Fungal Host Lyophyllum sp. Strain Karsten under Soil-Mimicking Conditions
Source: PubMed Central journal article supplement (PMC5209427; doi:10.1007/s00248-016-0885-7), 2016-11-14
Supplement: 248_2016_885_MOESM3_ESM.pdf [file 248_2016_885_MOESM3_ESM.pdf]

**Transcriptional responses of the bacterium *Burkholderia terrae* BS001 to the fungal host *Lyophyllum* sp. strain Karsten under soil-mimicking conditions**

Irshad Ul Haq\* Francisco Dini-Andreote and Jan Dirk van Elsas  
Microbial Ecology Group, Groningen Institute of Evolutionary Life Sciences (GELIFES),  
Nijenborgh 7, 9747 AG, University of Groningen, The Netherlands.

\*Corresponding author: Irshad Ul Haq, Microbial Ecology, Groningen Institute of  
Evolutionary Life Sciences (GELIFES), Nijenborgh 7, 9747 AG, University of Groningen,  
The Netherlands.

E-mail address: [i.u.haq@rug.nl](mailto:i.u.haq@rug.nl)

**Microbial Ecology**

**Figure S3 Three gene clusters potentially involved in the metabolism of oxalate.** Heat map showing the expression pattern of genes belonging to different clusters presumed to be involved in the degradation and uptake of oxalate at three different time points (T1, T2 and T3) The heat map was constructed based on normalized read counts. The standardized normalized read counts, denoted as the row Z-score, is plotted in color scale (red indicates higher expression and blue indicates lower expression). The names of the putative gene products are given in front of each gene with their respective locus tags.

# Gene clusters potentially involved in oxalate metabolism

Row z-score

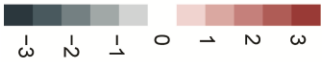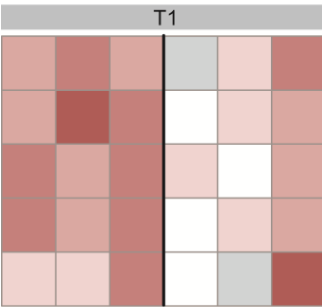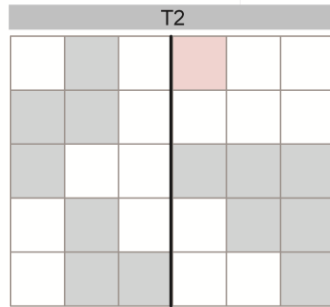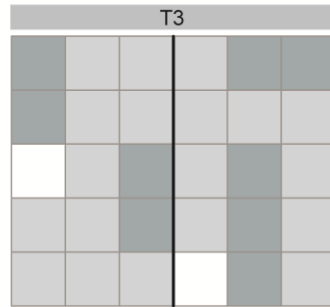

|                                                   |                |
|---------------------------------------------------|----------------|
| GntR family transcriptional regulator             | AKAUv1_1160009 |
| Oxalate/formate antiporter                        | AKAUv1_1160010 |
| Putative oxalyl-CoA decarboxylase                 | AKAUv1_1160013 |
| Formyl-CoA transferase, NAD(P)-binding            | AKAUv1_1160014 |
| Formyl-CoA transferase, NAD(P)-binding            | AKAUv1_1160019 |
| Formyl-CoA transferase, NAD(P)-binding            | AKAUv1_2660028 |
| Conserved membrane protein of unknown function    | AKAUv1_2660029 |
| Conserved membrane protein of unknown function    | AKAUv1_2660030 |
| RuBisCO operon transcriptional regulator          | AKAUv1_2660031 |
| Oxalate/formate antiporter                        | AKAUv1_2660032 |
| Putative aldehyde dehydrogenase DhaS              | AKAUv1_2390002 |
| Tartronate semialdehyde reductase, NADH-dependent | AKAUv1_2390002 |
| Hydroxypyruvate isomerase                         | AKAUv1_2390003 |
| Glyoxylate carboligase                            | AKAUv1_2390004 |

Treatment Control

Treatment Control

Treatment Control
