# Supplementary material for: Transcriptional Responses of the Bacterium Burkholderia terrae BS001 to the Fungal Host Lyophyllum sp. Strain Karsten under Soil-Mimicking Conditions
Source: PubMed Central journal article supplement (PMC5209427; doi:10.1007/s00248-016-0885-7), 2016-11-14

**Transcriptional responses of the bacterium *Burkholderia terrae* BS001 to the fungal host *Lyophyllum* sp. strain Karsten under soil-mimicking conditions**

Irshad Ul Haq\* Francisco Dini-Andreote and Jan Dirk van Elsas

Microbial Ecology Group, Groningen Institute of Evolutionary Life Sciences (GELIFES), Nijenborgh 7, 9747 AG, University of Groningen, The Netherlands.

\*Corresponding author: Irshad Ul Haq, Microbial Ecology, Groningen Institute of Evolutionary Life Sciences (GELIFES), Nijenborgh 7, 9747 AG, University of Groningen, The Netherlands.

E-mail address: [i.u.haq@rug.nl](mailto:i.u.haq@rug.nl)

**Microbial Ecology**

**Fig. S5 Differentially expressed genes of strain BS001 at T3 (day 8) following *Lyophyllum* sp. strain Karsten confrontation.** **a)** shows volcano plot, **b)** shows MA plot and **c)** shows bar charts that are indicating fold changes on log scale for individual genes (red: upregulated, blue: downregulated) grouped into broad functional COG classes, showing differential expression after fungal confrontation ( $P < 0.05$ ; DESeq).

**COG classes:** C– energy production and conversion; E– amino acid transport and metabolism; G– carbohydrate transport and metabolism; H– coenzyme transport and metabolism; I– lipid transport and metabolism; J– Translation, ribosomal structure and biogenesis; K– transcription; L– replication, recombination and repair; M– cell wall/membrane/envelope biogenesis; O– posttranslational modification, protein turnover, chaperones; P– inorganic ion transport and metabolism; Q– secondary metabolites biosynthesis, transport and catabolism; R– general function prediction; S– functions unknown; T– signal transduction mechanisms; U– intracellular trafficking, secretion, and vesicular transport; V– defense mechanisms.

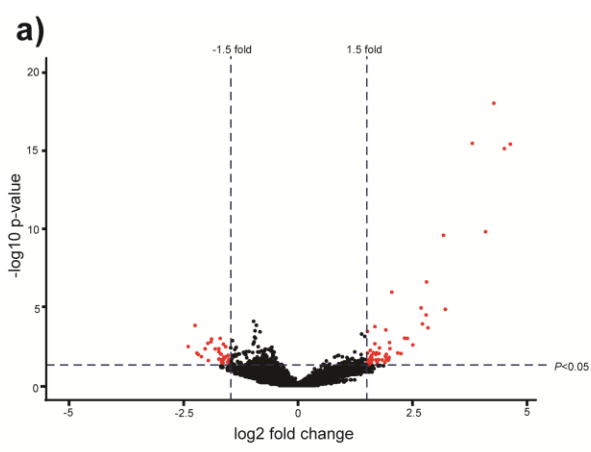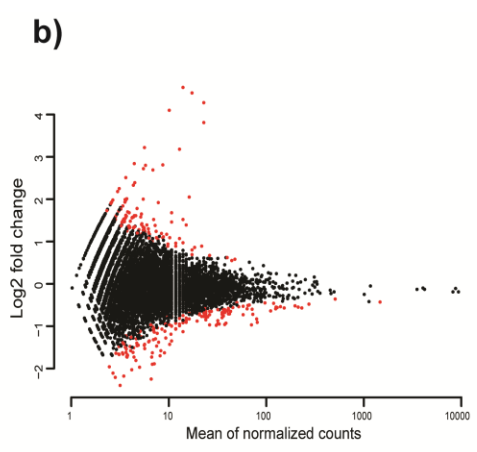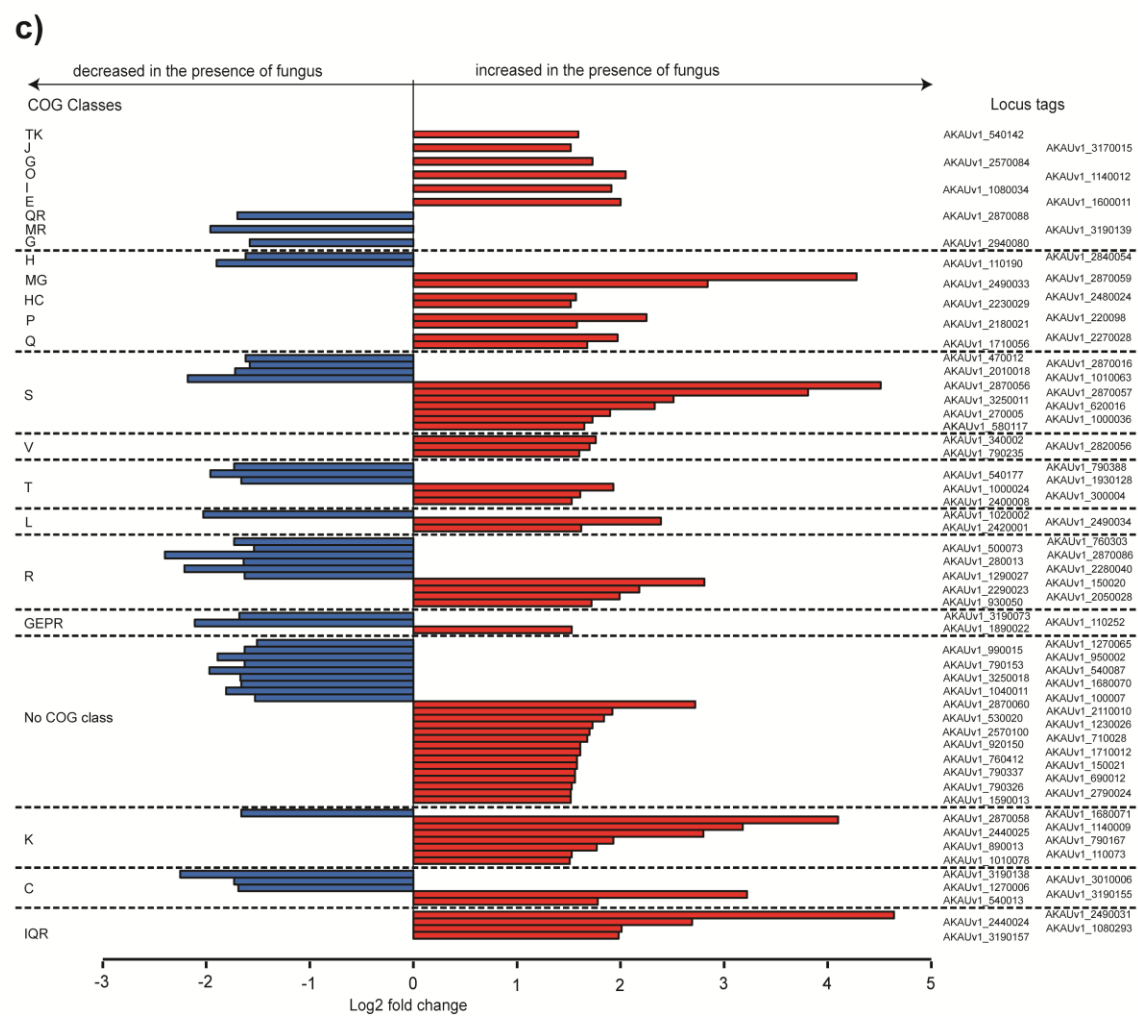

Supplement: 248_2016_885_MOESM5_ESM.pdf [file 248_2016_885_MOESM5_ESM.pdf]
